# Supplementary material for: Poly(phenanthrenequinone) as a conductive binder for nano-sized silicon negative electrodes
Source: Royal Society of Chemistry journal article supplement (doi:10.1039/c5ee00472a), 2015-01-01
Supplement: c5ee00472a1.pdf [file c5ee00472a1.pdf]

## Electronic Supplementary Information

### Poly(phenanthrenequinone) as a Conductive Binder for Nano-sized Silicon Negative Electrodes

Sang-Mo Kim,<sup>‡*a*</sup> Myeong Hak Kim,<sup>‡*a*</sup> Sung Yeol Choi,<sup>*a*</sup> Jae Gil Lee,<sup>*a*</sup> Jihyun Jang,<sup>*a*</sup> Jeong Beom Lee,<sup>*a*</sup> Ji Heon Ryu,<sup>*b*</sup> Seung Sik Hwang,<sup>*c*</sup> Jin-Hwan Park,<sup>*c*</sup> Kyusoon Shin,<sup>*d*</sup> Young Gyu Kim\*<sup>*a*</sup> and Seung M. Oh\*<sup>*a*</sup>

*a* Department of Chemical and Biological Engineering, Seoul National University, Seoul 151-744, Korea

*b* Graduate School of Knowledge-based Technology and Energy, Korea Polytechnic University, Siheung-si, Korea

*c* Energy Lab, Samsung Advanced Institute of Technology, Samsung Electronics, 560 Maetan-dong, Suwon, Korea

*d* Dongjin Semichem Co., 613 Sampyungdong, Bundanggu, Seongnamsi, Gyeonggido, 463-400, Korea

<sup>‡</sup> These authors contributed equally to this work.

## Synthesis of 3,6-poly(phenanthrenequinone) (PPQ)

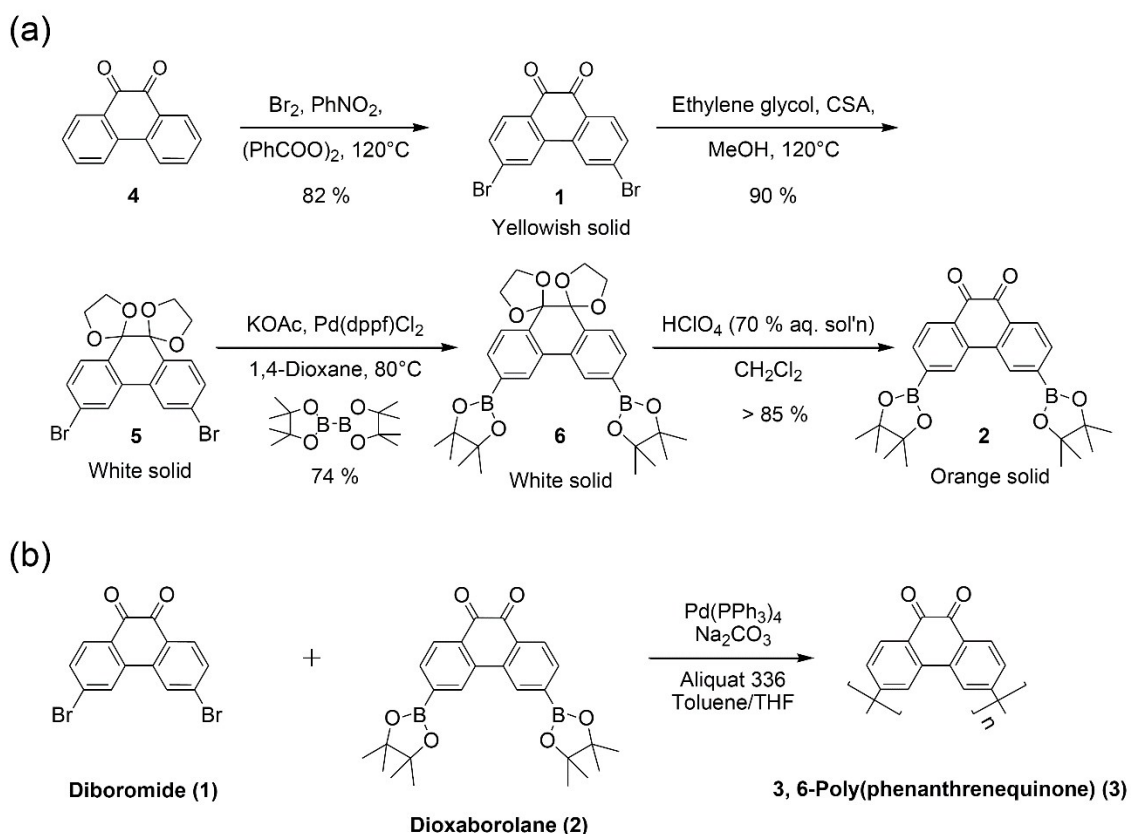

**Fig. S1.** Synthetic procedure for monomers (a) and polymer (b).

### General

Materials for synthesis of PPQ were purchased from commercial suppliers and used without further purification except solvents. Tetrahydrofuran (THF) was distilled in the presence of sodium with benzophenone and 1,4-dioxane, toluene were distilled in the presence of calcium hydride under  $\text{N}_2$  atmosphere.

All the experimental glassware, syringes, and magnetic stirring bars were oven-dried at  $120^\circ\text{C}$  for at least 4 h and stored in desiccator prior to use. Air or moisture sensitive

reactions were conducted under Ar atmosphere. The reactions were checked by thin layer chromatography plate. Analytical thin layer chromatography (TLC) was performed with Merck 60 F<sub>254</sub> glass plates pre-coated with a 0.25-mm thickness of silica gel and then monitored under UV light (254 nm) and visualized with phosphomolybdic acid staining solution. Column chromatography was performed on Kiesel gel 60 (70~230 mesh) silica gel.

<sup>1</sup>H and <sup>13</sup>C NMR spectra were measured at 400 MHz and 100 MHz, respectively, using CDCl<sub>3</sub> as a solvent on a Bruker Avance III spectrometer unless stated otherwise. The data were reported as follows in ppm ( $\delta$ ) from the internal standard (TMS, 0.0 ppm): chemical shift (multiplicity, integration, coupling constant in Hz). Gel permeation chromatography (GPC) analysis against poly(methyl methacrylate) standards was performed in DMF on Ultimate 3000 GPC with LPG-3400SD pump, Shodex KD-801 columns and Refracto Max 520, a refractive index detector. High resolution mass spectra were obtained on JEOL JMS-600W (mass system), Agilent 6890 (GC system) with electron ionization mode. Melting points were measured on a Meltemp apparatus in an open capillary tube.

### **3,6-Dibromophenanthrene-9,10-dione (1)**

9,10-Phenanthrenequinone (**4**) (4.00 g, 19.2 mmol) was placed in a round bottom flask and nitrobenzene (30 ml) was added. Bromine (5 ml, 96.0 mmol) and dibenzoyl peroxide (0.15 g, 0.96 mmol) was additionally added and the reaction mixture was heated under reflux at 120°C for 15~16 h with Na<sub>2</sub>SO<sub>3</sub> trap apparatus.<sup>1-3</sup> After cooling the reaction mixture, solid precipitate was filtered and washed with ethanol or methanol. Further purification was conducted by a recrystallization in xylene to give **1** as a yellowish solid (5.16 g, 82 %): mp 290°C; <sup>1</sup>H NMR  $\delta$  = 8.12 (d, 2H), 8.07 (d, 2H), 7.67 (dd, 2H); <sup>13</sup>C NMR  $\delta$  = 178.8, 135.9, 133.4, 132.1, 129.8, 127.4; HRMS (EI) calcd for C<sub>14</sub>H<sub>6</sub>Br<sub>2</sub>O<sub>2</sub> [M]<sup>+</sup> 365.8714, found 365.8714.

### **3,6-Dibromophenanthrene-9,10-di(ethyleneglycol)ketal (5)**

**1** (1.00 g, 2.73 mmol) was placed in a pressure tube and methanol (15 ml) was added. (±)-camphorsulfonic acid (0.82 g, 0.82 mmol) and ethylene glycol (4.57 ml, 81.9 mmol) were added to reaction mixture and heated at 120°C for 12 h.<sup>4,5</sup> Reaction mixture was converted into white color after 12 h and cooled to room temperature. Crude mixture was filtered and washed with diethyl ether to give **5** as a white solid (1.12 g, 90 %): mp 305°C; <sup>1</sup>H NMR δ = 7.96 (s, 2H), 7.62 (d, 2H), 7.56 (d, 2H), 4.16, 3.63 (br, 8H); <sup>13</sup>C NMR δ = 133.8, 132.2, 132.1, 128.2, 127.0, 124.4, 92.1, 61.3; HRMS (EI) calcd for C<sub>18</sub>H<sub>14</sub>Br<sub>2</sub>O<sub>4</sub> [M]<sup>+</sup> 451.9258, found 451.9268.

### **3,6-Bis(4,4,5,5-tetramethyl-1,3,2-dioxaborolan-2-yl)phenanthrene-9,10-di(ethyleneglycol)ketal (6)**

**5** (2.00 g, 4.40 mmol) was dissolved in distilled 1,4-dioxane (150 ml) in a round bottom flask and Pd(dppf)Cl<sub>2</sub> (0.32 g, 0.44 mmol), bis(pinacolato)diboron (2.4 g, 2.1 mmol) and KOAc (2.59 g, 26.4 mmol) were added into the solution.<sup>6,7</sup> The reaction mixture was heated under reflux for 17 h under Ar atmosphere. After cooling, crude solution was filtered out through Celite with dichloromethane (DCM) and ethyl acetate (EtOAc). This organic solution was concentrated by rotary evaporator, and the crude solid was purified with silica gel column chromatography (Hexane:EtOAc = 2:1 → 1:1). Further purification was conducted with silica gel column chromatography (Hexane:EtOAc = 8:1 → 4:1) to give **6** as a white solid (1.79 g, 74 %): mp 309°C; <sup>1</sup>H NMR δ = 8.41 (s, 2H), 7.87 (d, 2H), 7.74 (d, 2H), 4.15, 3.67 (br, 8H), 1.35 (s, 24H); <sup>13</sup>C NMR δ = 135.5, 135.1, 132.5, 130.4, 125.3, 92.6, 84.0, 61.3, 24.8; HRMS (EI) calcd for C<sub>30</sub>H<sub>38</sub>O<sub>8</sub>B<sub>2</sub> [M]<sup>+</sup> 548.2753, found 548.2743.

### **3,6-Bis(4,4,5,5-tetramethyl-1,3,2-dioxaborolan-2-yl)phenanthrene-9,10-dione (2)**

**6** (1.94 g, 3.53 mmol) was dissolved in DCM (120 ml) and perchloric acid (70% aq. solution, 2.5 ml, 35.3 mmol) was added into the solution.<sup>8</sup> The reaction mixture was stirred vigorously for 1 h at room temperature. The reaction mixture was quenched by saturated NaHCO<sub>3</sub> solution and the organic layer was dried over MgSO<sub>4</sub>, filtered and concentrated by rotary evaporator. The obtained product was purified by washing with ethanol to give **2** as an orange solid (1.38 g, 85 %): mp 285°C; <sup>1</sup>H NMR  $\delta$  = 8.52 (s, 2H), 8.16 (d, 2H), 7.89 (d, 2H), 1.42 (s, 24H); <sup>13</sup>C NMR  $\delta$  = 180.8, 135.6, 135.0, 132.5, 130.3, 84.6, 24.9; HRMS (EI) calcd for C<sub>26</sub>H<sub>38</sub>O<sub>6</sub>B<sub>2</sub> [M]<sup>+</sup> 460.2228, found 460.2236.

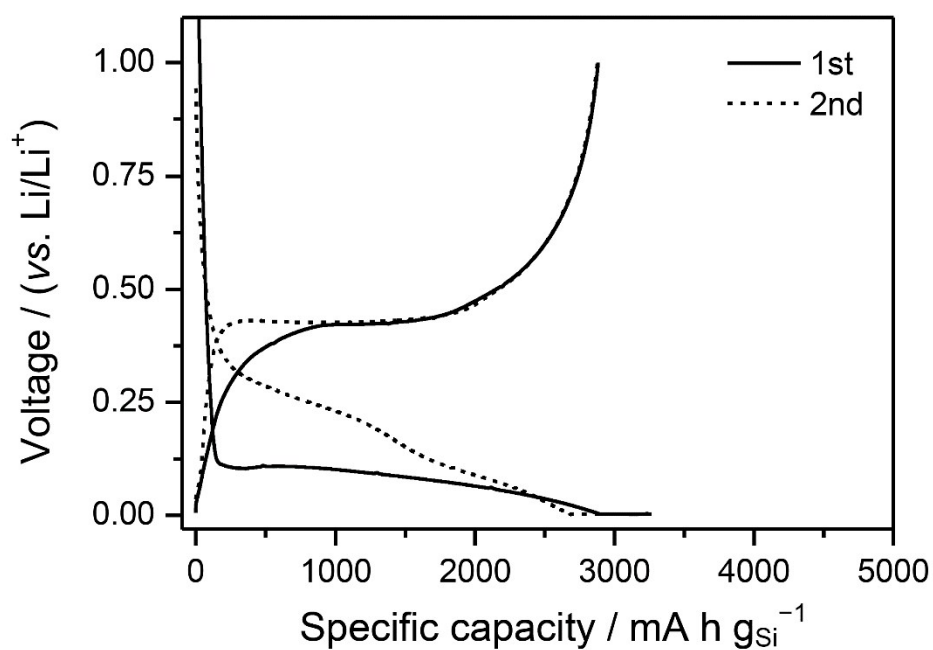

**Fig. S2.** The charge/discharge voltage profiles of Li/nano-Si cell fabricated with LiPAA binder. The composite electrode was prepared from nano-Si powder, conductive carbon (Super P) and LiPAA (5:2:3, weight ratio). Current density = 100 mA g<sub>Si</sub><sup>-1</sup> (0.028 C).

## References

- 1 M. V. Bhatt, *Tetrahedron*, 1964, **20**, 803–821.
- 2 K. Brunner, A. van Dijken, H. Börner, J. J. A. M. Bastiaansen, N. M. M. Kiggen and B. M. W. Langeveld, *J. Am. Chem. Soc.*, 2004, **126**, 6035–6042.
- 3 B. Kobin, L. Grubert, S. Blumstengel, F. Henneberger and S. Hecht, *J. Mater. Chem.*, 2012, **22**, 4383–4390.
- 4 L. A. Estrada and D. C. Neckers, *Org. Lett.*, 2011, **13**, 3304–3307.
- 5 Y. Shirai, A. J. Osgood, Y. Zhao, Y. Yao, L. Saudan, H. Yang, C. Yu-Hung, L. B. Alemany, T. Sasaki, J.-F. Morin, J. M. Guerrero, K. F. Kelly and J. M. Tour, *J. Am. Chem. Soc.*, 2006, **128**, 4854–4864.
- 6 T. Ishiyama, M. Murata and N. Miyaura, *The Journal of Organic Chemistry*, 1995, **60**, 7508–7510.
- 7 T. Lee, C. A. Landis, B. M. Dhar, B. J. Jung, J. Sun, A. Sarjeant, H.-J. Lee and H. E. Katz, *J. Am. Chem. Soc.*, 2009, **131**, 1692–1705.
- 8 R. Mondal, S. Ko, E. Verploegen, H. A. Becerril, M. F. Toney and Z. Bao, *J. Mater. Chem.*, 2011, **21**, 1537–1543.
